# Supplementary material
Source: PubMed Central journal article supplement (PMC9509410)
Supplement: NIHMS1813905-supplement-2.pdf [file NIHMS1813905-supplement-2.pdf]

**eFigure 4 – Spherical Equivalent Refractive Error at 12 Months by Zone at Time of Laser**

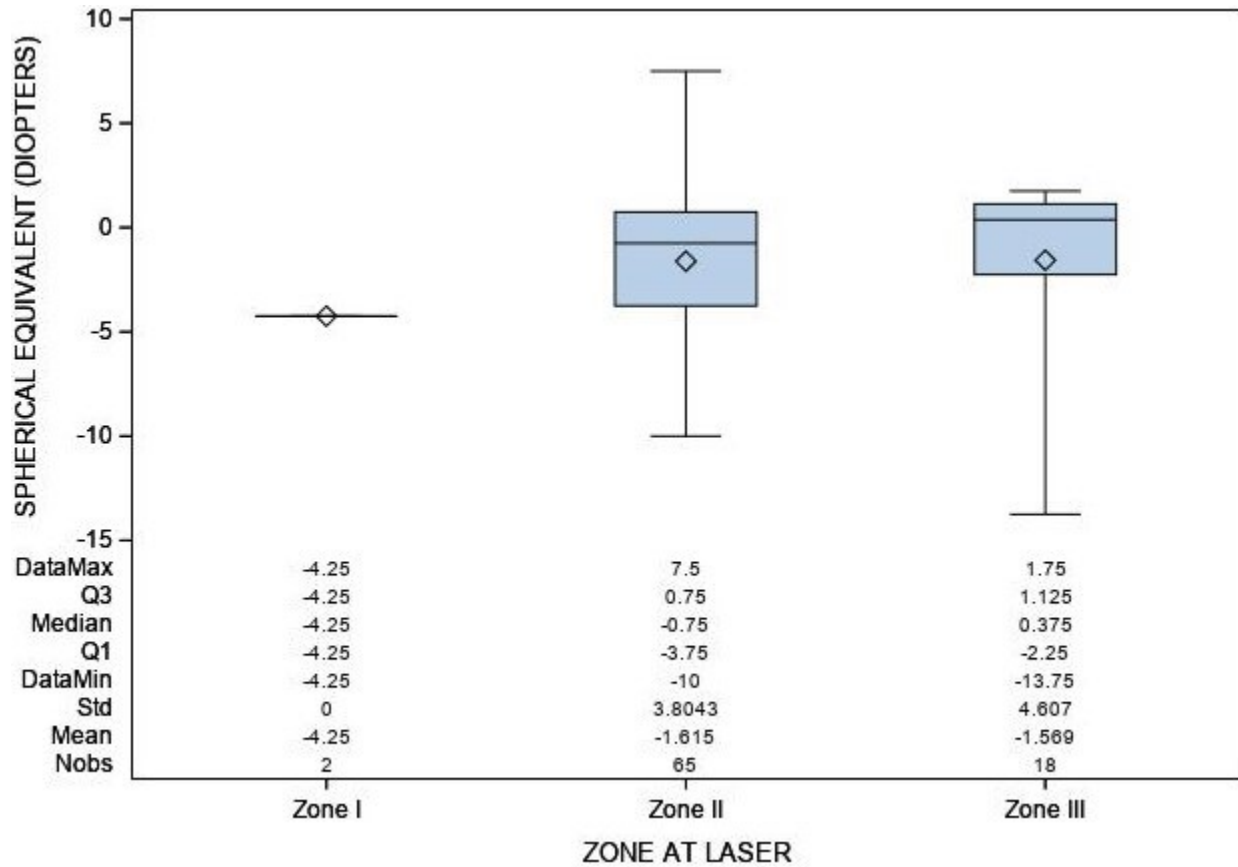

Distribution of SE refractive error (in diopters) shown by zone at the time of laser, for those eyes which received laser for any reason. Mean (standard deviation) of SE refractive error was -4.25 (0) diopters for 2 eyes in Zone I, -1.62 (3.80) diopters for 65 eyes in Zone II, and -1.57 (4.61) diopters for 18 eyes in Zone III.
