# Supplementary material
Source: PubMed Central journal article supplement (PMC9509410)
Supplement: NIHMS1813905-supplement-3.pdf [file NIHMS1813905-supplement-3.pdf]

**eTable 2.** Additional Treatment<sup>a</sup> of Study Eyes by Category of Type 1 ROP at Enrollment

|                                        | <b>Zone I, any Stage with Plus Disease</b> | <b>Zone I, Stage 3 without Plus Disease</b> | <b>Zone II, Stage 2 or 3 with Plus Disease</b> | <b>All Eyes</b> |
|----------------------------------------|--------------------------------------------|---------------------------------------------|------------------------------------------------|-----------------|
| <b>Enrolled &amp; Treated</b>          | 33                                         | 19                                          | 61                                             | 113             |
| <b>No additional treatment</b>         | 17<br>(52%)                                | 5<br>(26%)                                  | 29<br>(48%)                                    | 51<br>(45%)     |
| <b>Additional Treatment Indication</b> |                                            |                                             |                                                |                 |
| <b>Severe ROP</b>                      | 8<br>(24%)                                 | 7<br>(37%)                                  | 16<br>(26%)                                    | 31<br>(27%)     |
| <b>Treatment failure</b>               | 1<br>(3%)                                  | 1<br>(5%)                                   | 4<br>(7%)                                      | 6<br>(5%)       |
| <b>Early reactivation</b>              | 1<br>(3%)                                  | 0<br>(0%)                                   | 3<br>(5%)                                      | 4<br>(4%)       |
| <b>Late reactivation</b>               | 6<br>(18%)                                 | 6<br>(32%)                                  | 9<br>(15%)                                     | 21<br>(19%)     |
| <b>Persistent avascular retina</b>     | 8<br>(24%)                                 | 7<br>(37%)                                  | 16<br>(26%)                                    | 31<br>(27%)     |

<sup>a</sup>Additional treatment following initial intravitreal bevacizumab included laser retinal photocoagulation or intravitreal bevacizumab at investigator discretion.
