# Supplementary material
Source: PubMed Central journal article supplement (PMC9509410)
Supplement: NIHMS1813905-supplement-4.pdf [file NIHMS1813905-supplement-4.pdf]

**eTable 3.** Additional Treatment<sup>a</sup> for Treatment Failure or Early/Late Reactivation of Type 1 ROP in Study Eyes

|                                             | <b>N</b> | <b>Number (%) Treated after Treatment Failure or Early/Late Reactivation (95% CI)</b> | <b>Relative Risk (95% CI)</b> |
|---------------------------------------------|----------|---------------------------------------------------------------------------------------|-------------------------------|
| <b>Dose of Bevacizumab<sup>b</sup></b>      |          |                                                                                       |                               |
| 0.250 mg                                    | 11       | 2 (18%)<br>2% to 52%                                                                  | ref <sup>c</sup>              |
| 0.125 mg                                    | 14       | 4 (29%)<br>8% to 58%                                                                  | 1.6 (0.3 to 7.1)              |
| 0.063 mg                                    | 24       | 8 (33%)<br>16% to 55%                                                                 | 1.8 (0.5 to 7.3)              |
| 0.031 mg                                    | 9        | 0 (0%)<br>0% to 34%                                                                   | -                             |
| 0.016 mg                                    | 13       | 4 (31%)<br>9% to 61%                                                                  | 1.7 (0.4 to 7.6)              |
| 0.008 mg                                    | 9        | 3 (33%)<br>7% to 70%                                                                  | 1.8 (0.4 to 8.7)              |
| 0.004 mg                                    | 10       | 4 (40%)<br>12% to 74%                                                                 | 2.2 (0.5 to 9.5)              |
| 0.002 mg                                    | 23       | 6 (26%)<br>10% to 48%                                                                 | 1.4 (0.3 to 6.0)              |
| <b>Category of Type 1 ROP at Enrollment</b> |          |                                                                                       |                               |
| Zone I, any Stage with Plus Disease         | 33       | 8 (24%)<br>11% to 42%                                                                 | ref <sup>c</sup>              |
| Zone I, Stage 3 without Plus Disease        | 19       | 7 (37%)<br>16% to 62%                                                                 | 1.6 (0.7 to 3.7)              |
| Zone II, Stage 2 or 3 with Plus Disease     | 61       | 16 (26%)<br>16% to 39%                                                                | 1.1 (0.5 to 2.4)              |

CI = confidence interval

<sup>a</sup> Re-treatment (additional treatment following initial intravitreal bevacizumab) included laser retinal photocoagulation or intravitreal bevacizumab at investigator discretion.

<sup>b</sup> Gray text indicates doses that were previously reported (<sup>14</sup>).

<sup>c</sup> This is the reference category. All other groups were compared to this category.
