# Supplementary material
Source: PubMed Central journal article supplement (PMC9509410)
Supplement: NIHMS1813905-supplement-5.pdf [file NIHMS1813905-supplement-5.pdf]

**eTable 4. Characteristics of Infants, Stratified by Completion of the 12-Month Outcome Examination**

|                                                                                | Completing<br>N=98 |     | Not Completing<br>N=22 |     |
|--------------------------------------------------------------------------------|--------------------|-----|------------------------|-----|
|                                                                                | N                  | %   | N                      | %   |
| <b>Sex</b>                                                                     |                    |     |                        |     |
| Female                                                                         | 40                 | 41% | 9                      | 41% |
| <b>Race/Ethnicity</b>                                                          |                    |     |                        |     |
| White                                                                          | 51                 | 52% | 14                     | 64% |
| Black/African American                                                         | 16                 | 16% | 3                      | 14% |
| Hispanic or Latino                                                             | 14                 | 14% | 3                      | 14% |
| Asian/American Indian/Alaskan Native/Hawaiian                                  | 7                  | 7%  | 1                      | 5%  |
| More than one race                                                             | 3                  | 3%  | 1                      | 5%  |
| Unknown/not reported                                                           | 7                  | 7%  | 0                      | 0%  |
| <b>Gestational Age (weeks)</b>                                                 |                    |     |                        |     |
| Mean (SD)                                                                      | 24.9 (1.7)         |     | 24.8 (1.3)             |     |
| Median (quartiles)                                                             | 24.8 (23.7, 25.6)  |     | 24.2 (23.9, 25.9)      |     |
| <b>Initial Intravitreal Bevacizumab Dose in Study Eye (mg)</b>                 |                    |     |                        |     |
| 0.002                                                                          | 21                 | 21% | 3                      | 14% |
| 0.004                                                                          | 10                 | 10% | 2                      | 9%  |
| 0.008                                                                          | 8                  | 8%  | 1                      | 5%  |
| 0.016                                                                          | 13                 | 13% | 1                      | 5%  |
| 0.031                                                                          | 6                  | 6%  | 4                      | 18% |
| 0.063                                                                          | 16                 | 16% | 8                      | 36% |
| 0.125                                                                          | 13                 | 13% | 3                      | 14% |
| 0.25                                                                           | 11                 | 11% | 0                      | 0%  |
| <b>Stage of ROP in Study Eye at Baseline</b>                                   |                    |     |                        |     |
| Stage 2 or 3 in Zone II with Plus Disease                                      | 54                 | 55% | 10                     | 45% |
| Stage 3 in Zone I w/o Plus Disease                                             | 17                 | 17% | 3                      | 14% |
| Any Stage in Zone I with Plus Disease                                          | 27                 | 28% | 9                      | 41% |
| <b>Birth Weight (gm)</b>                                                       |                    |     |                        |     |
| Mean (SD)                                                                      | 698 (302)          |     | 638 (154)              |     |
| Median (quartiles)                                                             | 646 (545, 740)     |     | 590 (545, 700)         |     |
| <b>Pre-existing Medical Conditions Related to Neurodevelopment<sup>a</sup></b> |                    |     |                        |     |
| Yes                                                                            | 31                 | 32% | 5                      | 23% |
| <b>Corrected Age at Time of 12-Month Exam (days)</b>                           |                    |     |                        |     |
| Mean (SD)                                                                      | 377 (47)           |     | n/a                    |     |
| Median (quartiles)                                                             | 366 (357, 379)     |     |                        |     |
| Range                                                                          | 203-542            |     |                        |     |

<sup>a</sup> Pre-existing conditions that could impact neurodevelopmental milestones, such as intraventricular hemorrhage, periventricular leukomalacia, and hydrocephalus.
