# Supplementary material
Source: PubMed Central journal article supplement (PMC9509410)
Supplement: NIHMS1813905-supplement-6.pdf [file NIHMS1813905-supplement-6.pdf]

**eTable 6. Infant-Level Clinical Examination Findings at the 12-Month Outcome Exam**

|                                                                 | Total Dose of Bevacizumab Injected Into Both Eyes Prior to 12-Months |     |                   |     |                    |     |                     |     |                   |     | P-Value          |
|-----------------------------------------------------------------|----------------------------------------------------------------------|-----|-------------------|-----|--------------------|-----|---------------------|-----|-------------------|-----|------------------|
|                                                                 | Overall                                                              |     | ≥0.50mg           |     | 0.1875 to 0.375 mg |     | 0.016 to 0.09375 mg |     | ≤0.012mg          |     |                  |
|                                                                 | N=98 <sup>a</sup>                                                    |     | N=22 <sup>a</sup> |     | N=29 <sup>a</sup>  |     | N=23 <sup>a</sup>   |     | N=24 <sup>a</sup> |     |                  |
|                                                                 | n                                                                    | %   | n                 | %   | n                  | %   | n                   | %   | n                 | %   |                  |
| <b>Ocular Alignment at Distance</b>                             |                                                                      |     |                   |     |                    |     |                     |     |                   |     |                  |
| Constant strabismus                                             | 5                                                                    | 5%  | 0                 | 0%  | 2                  | 7%  | 2                   | 9%  | 1                 | 4%  | -                |
| Intermittent strabismus                                         | 4                                                                    | 4%  | 0                 | 0%  | 1                  | 3%  | 1                   | 4%  | 2                 | 8%  |                  |
| Orthotropic                                                     | 58                                                                   | 59% | 12                | 55% | 19                 | 66% | 16                  | 70% | 11                | 46% |                  |
| Unable                                                          | 26                                                                   | 27% | 10                | 45% | 7                  | 24% | 4                   | 17% | 5                 | 21% |                  |
| Not Done                                                        | 5                                                                    | 5%  | 0                 | 0%  | 0                  | 0%  | 0                   | 0%  | 5                 | 21% |                  |
| <b>Ocular Alignment at Near</b>                                 |                                                                      |     |                   |     |                    |     |                     |     |                   |     |                  |
| Constant strabismus                                             | 11                                                                   | 11% | 0                 | 0%  | 6                  | 21% | 4                   | 17% | 1                 | 4%  | -                |
| Intermittent strabismus                                         | 17                                                                   | 17% | 4                 | 18% | 6                  | 21% | 5                   | 22% | 2                 | 8%  |                  |
| Orthotropic                                                     | 63                                                                   | 64% | 17                | 77% | 17                 | 59% | 13                  | 57% | 16                | 67% |                  |
| Unable                                                          | 2                                                                    | 2%  | 1                 | 5%  | 0                  | 0%  | 1                   | 4%  | 0                 | 0%  |                  |
| Not Done                                                        | 5                                                                    | 5%  | 0                 | 0%  | 0                  | 0%  | 0                   | 0%  | 5                 | 21% |                  |
| <b>Constant or Intermittent Strabismus at Distance or Near?</b> | 28                                                                   | 29% | 4                 | 18% | 12                 | 41% | 9                   | 39% | 3                 | 13% | .86 <sup>b</sup> |
| <b>Manifest Nystagmus Present?</b>                              | 12                                                                   | 12% | 5                 | 23% | 2                  | 7%  | 3                   | 13% | 2                 | 8%  | .50 <sup>b</sup> |
| <b>Amblyopia Present?</b>                                       | 7                                                                    | 7%  | 2                 | 9%  | 2                  | 7%  | 2                   | 9%  | 1                 | 4%  | 1.0 <sup>c</sup> |
| <b>Anisometropia<sup>d</sup><br/>(Spherical Equivalent)</b>     |                                                                      |     |                   |     |                    |     |                     |     |                   |     |                  |
| Refraction not done                                             | 7                                                                    | 7%  | 1                 | 5%  | 0                  | 0%  | 1                   | 4%  | 5                 | 21% |                  |
| 0.00D                                                           | 33                                                                   | 34% | 6                 | 27% | 15                 | 52% | 6                   | 26% | 6                 | 25% |                  |
| >0.00D to ≤1.50D                                                | 42                                                                   | 43% | 10                | 45% | 11                 | 38% | 12                  | 52% | 9                 | 38% |                  |
| >1.50D                                                          | 15                                                                   | 15% | 5                 | 23% | 2                  | 7%  | 4                   | 17% | 4                 | 17% |                  |
| Mean (SD)                                                       | 1.02D (1.99D)                                                        |     | 1.48D (2.75D)     |     | 0.76D (2.01D)      |     | 1.18D (1.85D)       |     | 0.72D (0.85D)     |     |                  |
| Median                                                          | 0.44D                                                                |     | 0.50D             |     | 0.00D              |     | 0.50D               |     | 0.25D             |     |                  |
| Quartiles                                                       | 0.00D,1.13D                                                          |     | 0.00D,1.00D       |     | 0.00D, 0.56D       |     | 0.00D,1.25D         |     | 0.00D,1.25D       |     |                  |
| Range                                                           | 0.00D to 12.00D                                                      |     | 0.00D to 12.00D   |     | 0.00D to 10.50D    |     | 0.00D to 6.75D      |     | 0.00D to 2.50D    |     | .47 <sup>c</sup> |

CI = Confidence Interval

<sup>a</sup> Number of infants treated initially with bevacizumab examined at the 12-month exam. Total dose of bevacizumab grouped into quartiles.

<sup>b</sup> P-value from logistic regression between the binary outcome and log total patient dose as a continuous factor.

<sup>c</sup> Since limited number of outcomes, P-value from Fisher's Exact test for an association between the binary outcome and total dose as a categorical factor.

<sup>d</sup> Excludes 1 patient with aphakia.

<sup>e</sup> P-value from linear model for an association between the continuous outcome and total dose as a categorical factor.
