# Supplementary material
Source: PubMed Central journal article supplement (PMC9509410)
Supplement: NIHMS1813905-supplement-7.pdf [file NIHMS1813905-supplement-7.pdf]

eTable 7. Eye-Level Examination Findings at the 12-Month Outcome Exam

|                               | Overall                 |     | Total Dose of Bevacizumab Injected Into Eye Prior to 12-Months |    |                        |     |                        |     |                        |     |                        |     |                        |     |                        |     |                        |     |                        |     | P-Value               |     |                  |
|-------------------------------|-------------------------|-----|----------------------------------------------------------------|----|------------------------|-----|------------------------|-----|------------------------|-----|------------------------|-----|------------------------|-----|------------------------|-----|------------------------|-----|------------------------|-----|-----------------------|-----|------------------|
|                               |                         |     | >0.25mg                                                        |    | >0.125 to 0.25mg       |     | >0.063 to 0.125mg      |     | >0.031 to 0.063mg      |     | >0.016 to 0.031mg      |     | >0.008 to 0.016mg      |     | >0.004 to 0.008mg      |     | >0.002 to 0.004mg      |     | >0 to 0.002mg          |     |                       | 0mg |                  |
|                               | N=196 Eyes <sup>a</sup> |     | N=33 Eyes <sup>a</sup>                                         |    | N=26 Eyes <sup>a</sup> |     | N=24 Eyes <sup>a</sup> |     | N=18 Eyes <sup>a</sup> |     | N=16 Eyes <sup>a</sup> |     | N=17 Eyes <sup>a</sup> |     | N=16 Eyes <sup>a</sup> |     | N=21 Eyes <sup>a</sup> |     | N=16 Eyes <sup>a</sup> |     | N=9 Eyes <sup>a</sup> |     |                  |
|                               | n                       | %   | n                                                              | %  | n                      | %   | n                      | %   | n                      | %   | n                      | %   | n                      | %   | n                      | %   | n                      | %   | n                      | %   | n                     | %   | n                |
| Ocular Clinical Exam Findings | n                       | %   | n                                                              | %  | n                      | %   | n                      | %   | n                      | %   | n                      | %   | n                      | %   | n                      | %   | n                      | %   | n                      | %   | n                     | %   |                  |
| Abnormal Anterior Segment     | 3 <sup>b</sup>          | 2%  | 0                                                              | 0% | 1                      | 4%  | 1                      | 4%  | 1                      | 6%  | 0                      | 0%  | 0                      | 0%  | 0                      | 0%  | 0                      | 0%  | 0                      | 0%  | 0                     | 0%  | .37 <sup>c</sup> |
| Abnormal Cornea               | 1 <sup>b</sup>          | <1% | 0                                                              | 0% | 1                      | 4%  | 0                      | 0%  | 0                      | 0%  | 0                      | 0%  | 0                      | 0%  | 0                      | 0%  | 0                      | 0%  | 0                      | 0%  | 0                     | 0%  | 1.0 <sup>c</sup> |
| Abnormal Lens                 | 6 <sup>b</sup>          | 3%  | 2                                                              | 6% | 1                      | 4%  | 1                      | 4%  | 0                      | 0%  | 0                      | 0%  | 2                      | 12% | 0                      | 0%  | 0                      | 0%  | 0                      | 0%  | 0                     | 0%  | .64 <sup>c</sup> |
| Optic Nerve Atrophy           | 19                      | 10% | 1                                                              | 3% | 4                      | 15% | 3                      | 13% | 2                      | 11% | 1                      | 6%  | 0                      | 0%  | 2                      | 13% | 4                      | 19% | 2                      | 13% | 0                     | 0%  | .48 <sup>d</sup> |
| Macular Ectopia               | 3                       | 2%  | 1                                                              | 3% | 0                      | 0%  | 0                      | 0%  | 0                      | 0%  | 1                      | 6%  | 1                      | 6%  | 0                      | 0%  | 0                      | 0%  | 0                      | 0%  | 0                     | 0%  | .49 <sup>c</sup> |
| Retinal Detachment            | 3                       | 2%  | 1                                                              | 3% | 1                      | 4%  | 0                      | 0%  | 0                      | 0%  | 0                      | 0%  | 0                      | 0%  | 0                      | 0%  | 0                      | 0%  | 0                      | 0%  | 1 <sup>c</sup>        | 11% | .43 <sup>c</sup> |
| Retinal Fold                  | 0                       | 0%  | 0                                                              | 0% | 0                      | 0%  | 0                      | 0%  | 0                      | 0%  | 0                      | 0%  | 0                      | 0%  | 0                      | 0%  | 0                      | 0%  | 0                      | 0%  | 0                     | 0%  | -                |
| Any Abnormality Present?      | 31                      | 16% | 3                                                              | 9% | 6                      | 23% | 5                      | 21% | 3                      | 17% | 2                      | 13% | 3                      | 18% | 2                      | 13% | 4                      | 19% | 2                      | 13% | 1                     | 11% | .95 <sup>d</sup> |

Percentages are unadjusted for any correlation between eyes.

<sup>a</sup> Number of eyes initially examined at the 12-month exam. Gray text indicates doses that were previously reported (<sup>19</sup>).

<sup>b</sup> Nine eyes of seven infants; one infant had a smaller corneal diameter than normal in the study eye with inferior and superior anterior synechiae after receiving subsequent laser treatment; one infant had corectopia in both eyes; one infant developed progressive cataracts in both eyes after bevacizumab injections, and required cataract removal in both eyes following laser treatment ; 1 infant had tiny corneal opacity in the fellow eye; 1 infant had inferior posterior cortical cataract in the study eye; 1 infant had mild cataract in the study eye; and 1 infant had 0.5 mm anterior subcapsular opacity in the study eye.

<sup>c</sup> P-value from Fisher's Exact test without accounting for correlation between eyes for an association between the binary outcome and total dose as a categorical factor.

<sup>d</sup>P-value from logistic regression accounting for any correlation between eyes for an association between the binary outcome and total dose as a categorical factor.

<sup>e</sup>This was the fellow eye of an infant whose study eye received IVB. The fellow eye developed type 1 ROP and received laser at 49 weeks PMA, followed by subsequent retinal detachment.
